# Supplementary material for: Near-infrared unsymmetrical blue and green squaraine sensitizers
Source: Royal Society of Chemistry journal article supplement (doi:10.1039/c5pp00335k), 2016-01-04
Supplement: c5pp00335k1.pdf [file c5pp00335k1.pdf]

## Near-Infrared Unsymmetrical Blue and Green Squaraine Sensitizers

G. Hanumantha Rao,<sup>a,b</sup> A. Venkateswararao,<sup>a</sup> L. Giribabu,<sup>a</sup> Surya Prakash Singh<sup>\*a,b,c</sup>

<sup>a</sup>Inorganic and Physical Chemistry Division, CSIR-Indian Institute of Chemical Technology, Uppal road, Tarnaka, Hyderabad-500007, India

<sup>b</sup>Academy of Scientific and Innovative Research, CSIR-IICT

<sup>c</sup>Network Institute of Solar Energy, (CSIR-NISE) and Academy of Scientific and Innovative Research (AcSIR), New Delhi, India

Email: [spsingh@iict.res.in](mailto:spsingh@iict.res.in)

### Supporting Information

|                                                                                                                            |    |
|----------------------------------------------------------------------------------------------------------------------------|----|
| <b>Fig. S1.</b> <sup>1</sup> H NMR spectra of <b>4</b> in CDCl <sub>3</sub> .                                              | S2 |
| <b>Fig. S2.</b> <sup>13</sup> C NMR spectra of <b>4</b> in CDCl <sub>3</sub> .                                             | S2 |
| <b>Fig. S3.</b> <sup>1</sup> H NMR spectra of <b>SPSQ1</b> in CDCl <sub>3</sub> .                                          | S3 |
| <b>Fig. S4.</b> <sup>13</sup> C NMR spectra of <b>SPSQ1</b> in CDCl <sub>3</sub> .                                         | S3 |
| <b>Fig. S5.</b> <sup>1</sup> H NMR spectra of <b>SPSQ2</b> in CDCl <sub>3</sub> .                                          | S4 |
| <b>Fig. S6.</b> <sup>13</sup> C NMR spectra of <b>SPSQ2</b> in CDCl <sub>3</sub> .                                         | S4 |
| <b>Fig. S7.</b> Absorption and emission spectra of the dyes ( <b>SPSQ1</b> and <b>SPSQ2</b> ) recorded in dichloromethane. | S5 |

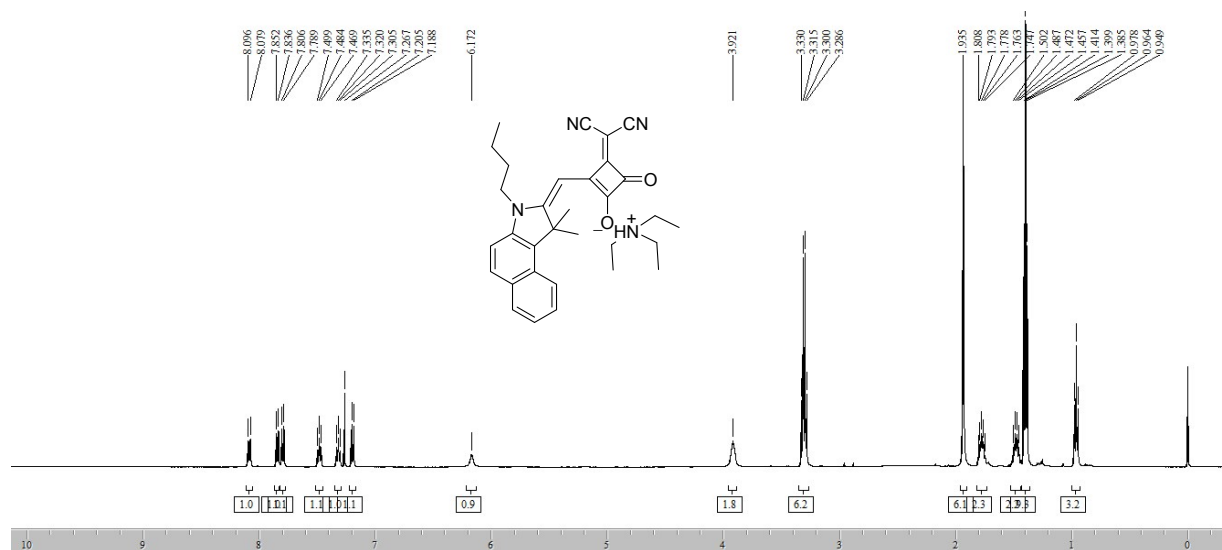

Fig. S1. <sup>1</sup>H NMR spectra of 4 in CDCl<sub>3</sub>.

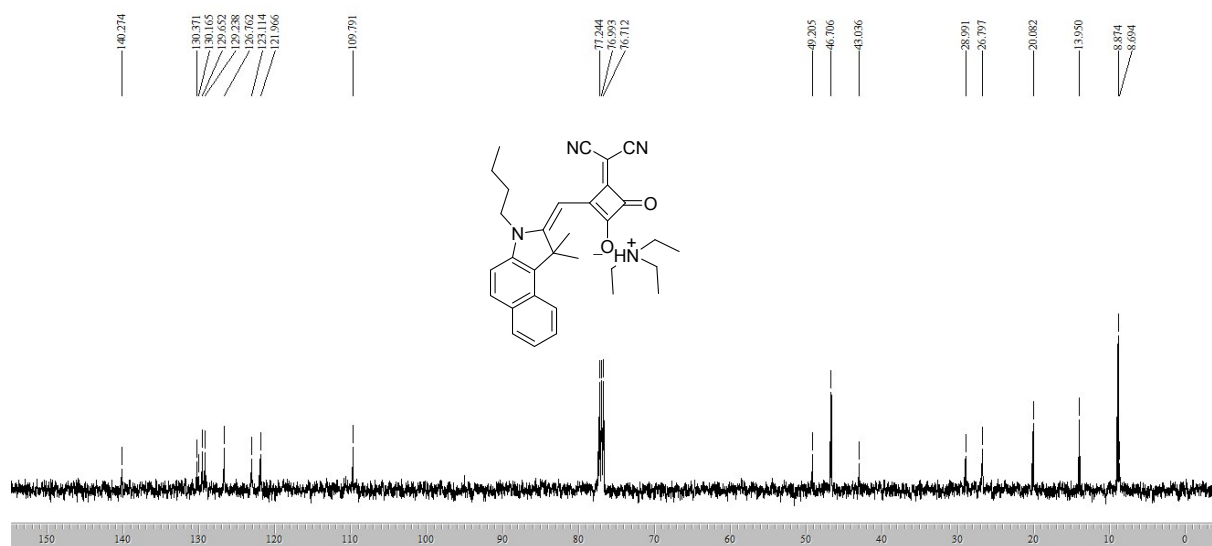

Fig. S2. <sup>13</sup>C NMR spectra of 4 in CDCl<sub>3</sub>.

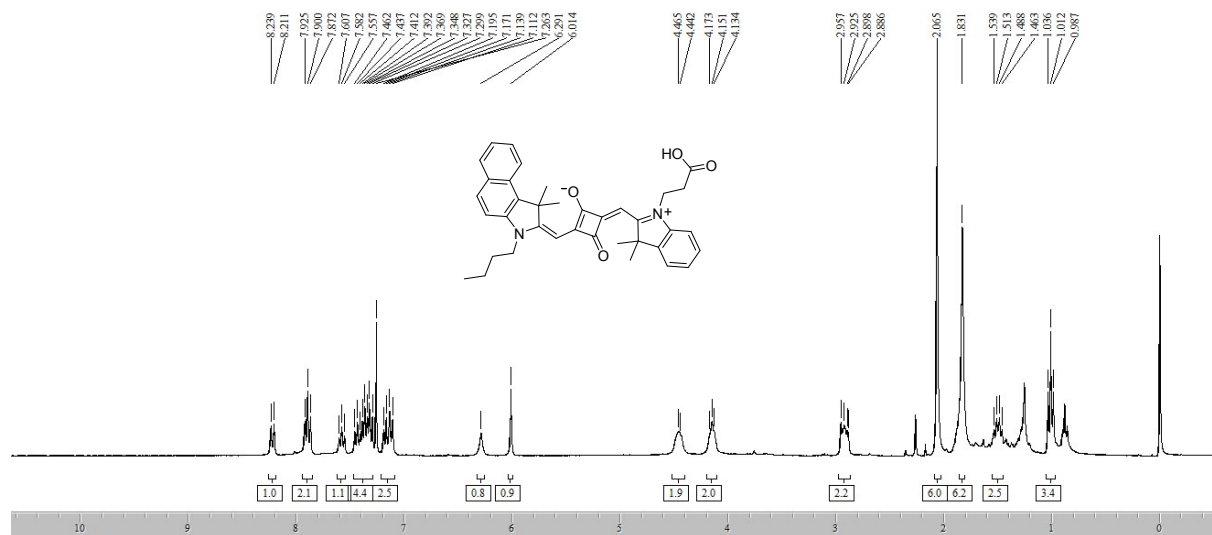

**Fig. S3.** <sup>1</sup>H NMR spectra of SPSQ1 in CDCl<sub>3</sub>.

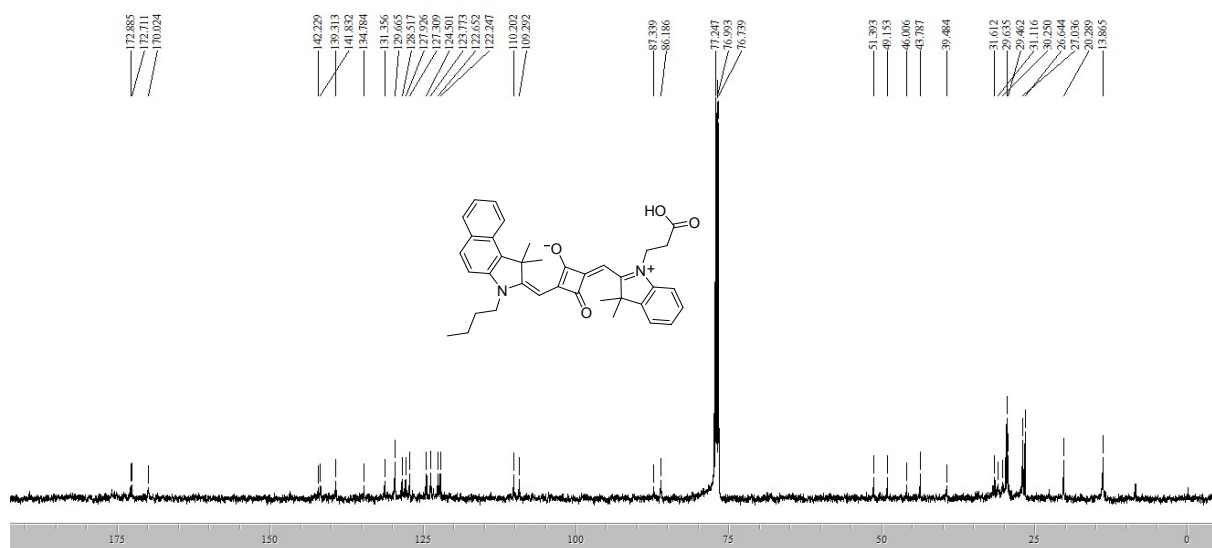

**Fig. S4.** <sup>13</sup>C NMR spectra of SPSQ1 in CDCl<sub>3</sub>.

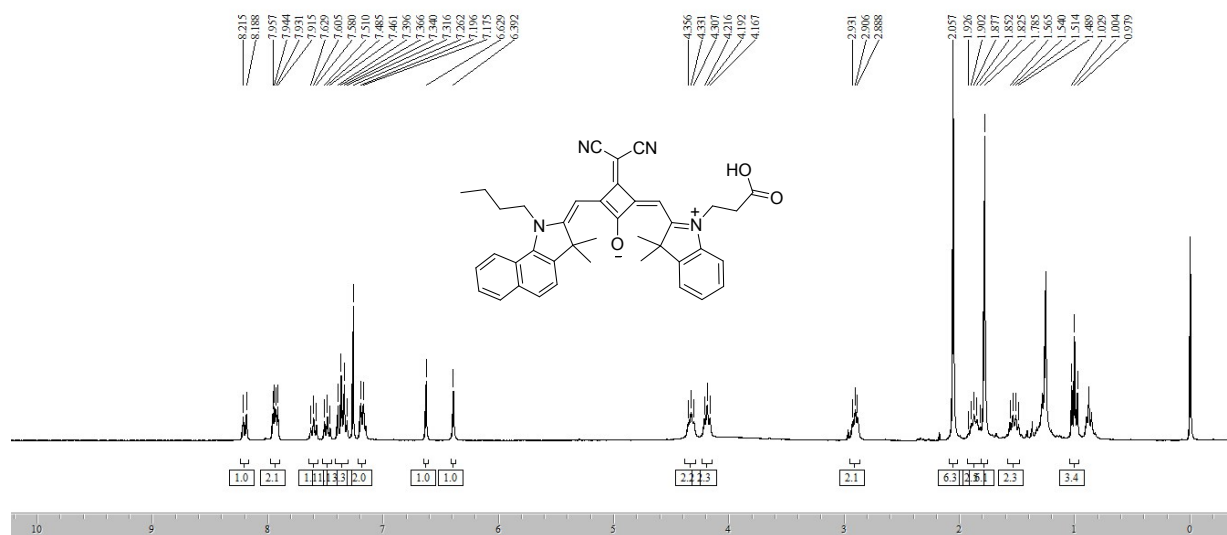

**Fig. S5.** <sup>1</sup>H NMR spectra of SPSQ2 in CDCl<sub>3</sub>.

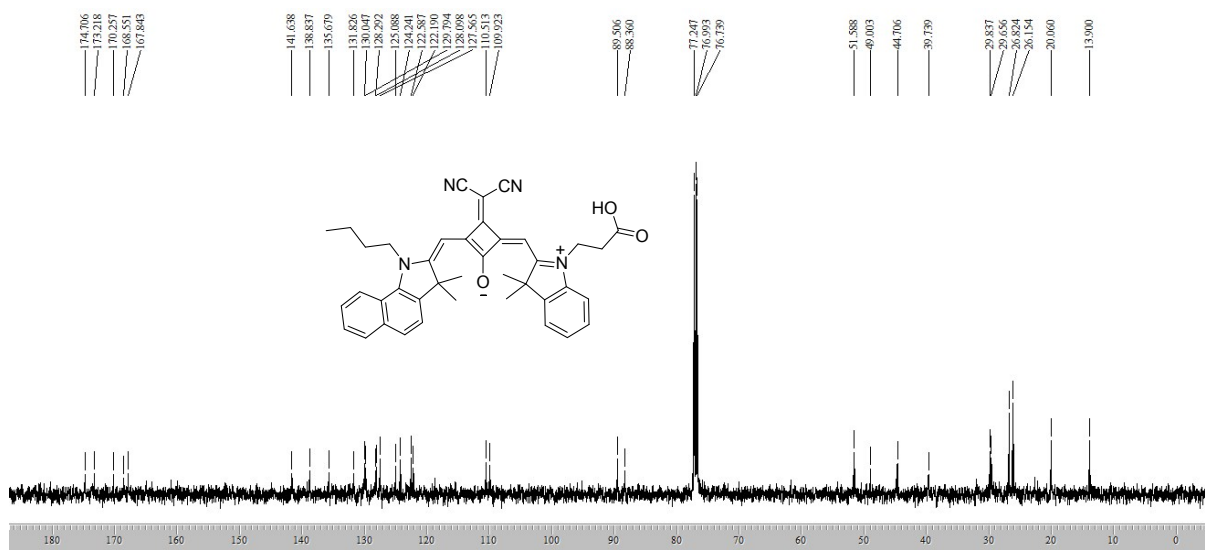

**Fig. S6.** <sup>13</sup>C NMR spectra of SPSQ2 in CDCl<sub>3</sub>.

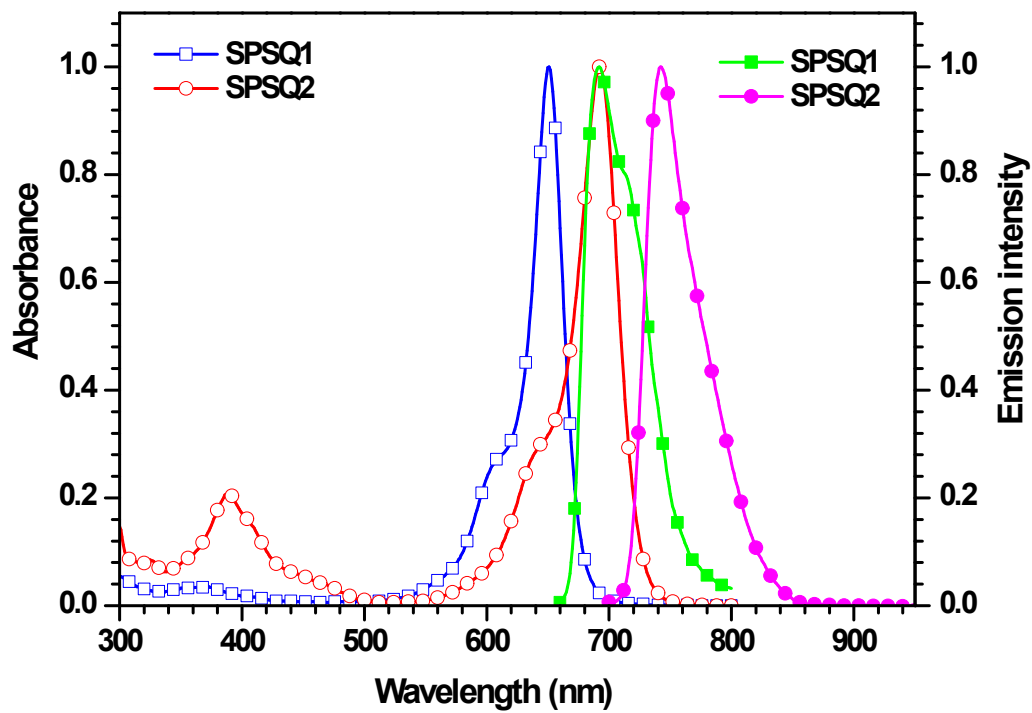

**Fig. S7.** Absorption and emission spectra of the dyes (SPSQ1 and SPSQ2) recorded in dichloromethane.
